1 TITLE

2 **DNA Binding Induces a *cis* to *trans* Switch in Cre**  
3 **Recombinase to Enable Intasome Assembly**

4 **AUTHORS**

5 Aparna Unnikrishnan<sup>1</sup>, Carlos D. Amero<sup>2</sup>, Deepak Kumar Yadav<sup>1</sup>, Kye Stachowski<sup>1</sup>, Devante  
6 Potter<sup>1</sup> and Mark P. Foster<sup>1\*</sup>

7

8 <sup>1</sup>Department of Chemistry and Biochemistry, The Ohio State University, Columbus, Ohio,  
9 USA 43210. <sup>2</sup>Laboratorio de Bioquímica y Resonancia Magnética Nuclear, Centro de  
10 Investigaciones Químicas, Instituto de Investigación en Ciencias Básicas y Aplicadas,  
11 Universidad Autónoma del Estado de Morelos, Avenida Universidad 1001, Colonia Chamilpa,  
12 Cuernavaca, Morelos, 62209, Mexico.

13

14 \*Corresponding Author: Mark P. Foster (email: [foster.281@osu.edu](mailto:foster.281@osu.edu); 614-292-1377).  
15 Department of Chemistry and Biochemistry, Columbus, OH 43210.

16

17 **ABSTRACT**

18 Mechanistic understanding of DNA recombination in the *Cre-loxP* system has largely been  
19 guided by crystallographic structures of tetrameric synaptic complexes. Those studies have  
20 suggested a role for protein conformational dynamics that has not been well characterized at  
21 the atomic level. We used solution NMR to discover the link between intrinsic flexibility and  
22 enzyme function in Cre recombinase. Remarkably, in the absence of DNA the C-terminal  
23 helix  $\alpha_N$ , implicated in assembly of synaptic complexes and regulation of DNA cleavage  
24 activity via *trans* protein-protein interactions, is found to adopt an apparent auto-inhibitory *cis*  
25 conformation. Binding to *loxP* DNA dislodges the C-terminus from this *cis* conformation,  
26 thereby enabling the *trans* protein-protein interactions required for assembly of  
27 recombinogenic Cre intasomes. These findings necessitate a re-examination of the  
28 mechanisms by which this widely utilized gene-editing tool selects target sites, avoids  
29 spurious DNA cleavage activity, and controls DNA recombination efficiency.

30

## 31 INTRODUCTION

32 Site specific DNA recombinases represent an attractive option for genome engineering – the  
33 insertion or exchange of genes into precise locations in chromosomes<sup>1–4</sup>. The tyrosine  
34 recombinase family of phage-derived enzymes (e.g.,  $\lambda$ -integrase, Cre and Flp recombinases),  
35 which evolved to facilitate viral infection, gene transposition and bacterial pathogenesis, have  
36 proven useful for applications that include DNA subcloning without restriction enzymes, and  
37 conditional expression of target genes<sup>5–7</sup>. These proteins bind specifically to pairs of inverted  
38 short palindromic DNA sequences (*recombinase binding elements*; RBEs) and mediate  
39 recombination by assembly of tetrameric *intasomes* (Fig. 1a, b) which perform concerted DNA  
40 strand cleavage, exchange and ligation reactions<sup>5,8,9</sup>. Compared to other genome  
41 engineering approaches<sup>10,11</sup>, site specific DNA recombinases have the advantage that they  
42 allow a high degree of specificity, don't require involvement of additional host-encoded  
43 factors, and are capable of generating cleanly integrated double-stranded DNA products<sup>3,12–</sup>  
44 <sup>14</sup>. These advantages motivate efforts to understand and manipulate the mechanisms of this  
45 family of enzymes.

46 Cre (Causes Recombination) is the best studied member of the tyrosine recombinase  
47 family, yet fundamental gaps exist in our understanding of its mechanism of DNA site  
48 selection, intasome assembly, and allosteric control of DNA cleavage. The overall  
49 mechanism of Cre-mediated DNA recombination has been mapped out via many biochemical  
50 and crystallographic studies<sup>5,15–19</sup>. The enzyme catalyzes recombination between a pair of  
51 homologous 34 bp *loxP* sites (Fig. 1c) via a highly orchestrated series of events involving  
52 recognition and binding of a pair of Cre molecules to its semi-palindromic recognition site  
53 containing two RBEs (*loxP* half-sites), “synapsis” of an antiparallel pair of Cre dimers bound  
54 to *loxP* to form a stable tetrameric structure, coordinated cleavage of two opposing DNA

55 strands to produce an intermediate with two of the Cre protomers covalently attached to a 3'-  
56 phosphate via a tyrosine linkage, followed by strand transfer and re-ligation to form a four-  
57 way DNA Holliday junction intermediate<sup>5</sup>. Two-fold asymmetry in the synaptic structures (Fig.  
58 1a) is implicated in regulation of DNA strand cleavage activity, and thereby influence the order  
59 of strand cleavage and direction by which the Holliday junction is resolved<sup>17,20,21</sup>.

60 Although much is known about the overall mechanism of the reactions catalyzed by  
61 Cre and related site-specific recombinases, the nature of the conformational changes in the  
62 protein and protein-DNA complexes that facilitate the various steps in the pathway remain  
63 poorly understood<sup>16,17,19,22–25</sup>. Cre binds its target sequences by forming a C-shaped clamp  
64 with a C-terminal catalytic domain (Cre<sup>Cat</sup>) possessing the namesake tyrosine residue on one  
65 side of the DNA, and on the other an N-terminal domain (Cre<sup>NTD</sup>), connected by an extended  
66 8 amino acid linker (Fig. 1). A series of sequential inter-protomer protein-protein interactions  
67 across the tetrameric synapse distinguish the structures of the active and inactive protomers.  
68 Within the catalytic domain, the tyrosine residue that serves as the nucleophile to catalyze  
69 phosphoryl transfer and formation of the covalent intermediate is located on the penultimate  
70 helix  $\alpha_M$ , while the  $\alpha_M$ -N loop and C-terminal helix  $\alpha_N$  from each protomer makes a *trans*  
71 contact (in a “clockwise” manner as viewed in Fig. 1a) to the neighboring protomer in the  
72 tetrameric complex. The  $\beta_2$ -3 loop of each protomer abuts its own helix  $\alpha_M$ , and in the  
73 tetramer packs proximally to helix  $\alpha_M$  of the neighboring protomer, in the opposite direction  
74 compared to helix  $\alpha_N$ . Structural asymmetry in tetrameric structures is localized to these two  
75 regions of the protein (Fig. 1a, b). The asymmetry in the C-terminal and inter-protomer  
76 interfaces observed in the synaptic complexes of Cre and other tyrosine recombinase family  
77 members suggest that the intrinsic dynamic behavior of the enzymes is important in  
78 controlling its function, both in mediating tetramer assembly, and for regulating protomer



79 activity<sup>26–32</sup>. Despite the importance of understanding the basis for conformational differences  
80 in Cre, structural insights have been largely limited to crystal structures of isosteric tetrameric  
81 synaptic complexes<sup>5,16,17,19</sup>.

82 We have used solution nuclear magnetic resonance (NMR) spectroscopy to explore  
83 the link between the intrinsic dynamic behavior of Cre and its function. First, NMR spectra of  
84 full-length Cre and of the isolated catalytic domain (Cre<sup>Cat</sup>) support the premise that the N-  
85 and C-terminal domains of Cre are structurally uncoupled. Nuclear spin relaxation  
86 experiments reveal flexibility in regions of Cre<sup>Cat</sup> that are associated with both protein-protein  
87 and protein-DNA interactions. Unexpectedly, we found that the region of the protein  
88 comprising C-terminal helix  $\alpha$ N is not highly dynamic, contrary to the expectation from crystal  
89 structures that it would be extended in solution<sup>5,16,17,19</sup>. Instead, NMR chemical shift  
90 perturbations and paramagnetic relaxation enhancement (PRE) experiments show the C-  
91 terminus of unbound Cre to be located in the DNA binding active site, in an apparent auto-  
92 inhibitory conformation. Upon binding to *loxP* DNA, the data show that the C-terminus is  
93 displaced, after which it is able to participate in fledgling intermolecular protein-protein  
94 interactions with other Cre molecules. These findings shed light on the previous paradoxical  
95 reports of *trans* interactions regulating Cre activity<sup>33</sup>, and represent a transformative advance  
96 in our understanding of the role of protein dynamics in regulating conservative site-specific  
97 DNA recombination.

98

## 99 RESULTS

### 100 NMR spin relaxation reveals unexpected rigidity in the Cre C-terminal helix $\alpha$ N

101 To explore the role of protein dynamics in enabling the interconversion of Cre reaction  
102 intermediates in solution, we expressed and purified full-length Cre (38.5 kDa, residues 1-  
103 343) and a C-terminal fragment encoding the interdomain linker along with the C-terminal  
104 domain (23.8 kDa, residues 127-343). This domain, herein termed Cre<sup>Cat</sup> (Fig. 1b, d) includes  
105 all seven active site residues (R173, E176, K201, H289, R292, W315 and Y324), the Cre-  
106 DNA binding specificity determinants (R259 and E262) as well as the C-terminal region  
107 implicated in *loxP* DNA binding cooperativity and synapsis (Fig. 1a)<sup>17,33-37</sup>. Both full-length  
108 Cre and Cre<sup>Cat</sup> are predominantly monomeric in the absence of DNA, as indicated by their  
109 elution times in size exclusion chromatography (Supplementary Fig. 1a). Comparison of 2D  
110 <sup>1</sup>H-<sup>15</sup>N TROSY-HSQC correlation spectra of Cre<sup>Cat</sup> and full-length Cre showed that the well-  
111 dispersed signals overlay well (Supplementary Fig. 1b). This indicates that Cre<sup>Cat</sup> folds  
112 independently in solution and that the N-terminal domain of Cre does not interact with the  
113 catalytic domain in solution, thereby justifying structural and dynamics studies of the isolated  
114 domain.

115 For backbone resonance assignments of Cre<sup>Cat</sup> we expressed, purified the [U-<sup>15</sup>N] and  
116 [U-<sup>15</sup>N, <sup>13</sup>C] labeled protein and recorded HSQC- and TROSY-based double- and triple-  
117 resonance NMR spectra. Homogeneity and integrity of protein constructs were verified by  
118 SDS-PAGE and mass spectrometry (data not shown). We obtained backbone resonance  
119 assignments for 195 of 214 non-proline amides (> 91%) (Fig. 1d, Supplementary Fig. 2 and  
120 3). Unassigned amide resonances include the two N-terminal residues (A127 and G128), and  
121 a few residues in the loop regions of Cre<sup>Cat</sup>, due to line broadening from intermediate  
122 conformational exchange.

123 To probe the fast timescale backbone dynamics in Cre<sup>Cat</sup>, we measured <sup>15</sup>N NMR (R<sub>1</sub>,  
124 R<sub>2</sub>) and {<sup>1</sup>H}-<sup>15</sup>N heteronuclear NOE (HetNOE) relaxation data (Fig. 2). The data show that  
125 Cre<sup>Cat</sup> backbone amides largely exhibits uniform relaxation rates, with an overall rotational  
126 correlation time ( $\tau_c$ ) of  $13.2 \pm 0.9$  ns, computed from the trimmed-mean R<sub>2</sub>/R<sub>1</sub> ratios<sup>38</sup>.  
127 Distinctly lower R<sub>2</sub>/R<sub>1</sub> ratios and decreased {<sup>1</sup>H}-<sup>15</sup>N hetNOE values indicating fast (ps-ns)  
128 internal motions, were observed for the linker residues through A134 preceding  $\alpha$ F, the  $\beta$ 2-3  
129 loop,  $\alpha$ J-K loop,  $\alpha$ M-N loop and a few residues after the C-terminal helix  $\alpha$ N. The  $\beta$ 2-3 loop  
130 forms inter-protomer contacts in Cre-DNA synaptic tetramers and adopts distinct  
131 conformations between the catalytically “active” and “inactive” forms of Cre (Fig. 1a, b)<sup>5</sup>. The  
132 data show the  $\alpha$ J-K loop to be flexible in free Cre<sup>Cat</sup> though it does not differ structurally  
133 between the two Cre isomers, consistent with a role in DNA binding, not in regulating  
134 recombination<sup>5</sup>. Surprisingly, although residues bracketing the C-terminal helix  $\alpha$ N exhibit  
135 evidence of fast internal motions, the relaxation rates for the helix  $\alpha$ N (A334- L339) are close  
136 to the average values, indicating that it tumbles with the catalytic core of the protein. This  
137 suggests that instead of being extended in solution as might be expected from the *trans*  
138 conformations observed in tetrameric crystal structures,  $\alpha$ N might adopt a distinct  
139 conformation in the free protein.

140

#### 141 **Truncation of C-terminal helix $\alpha$ N results in widespread CSPs in the core of Cre<sup>Cat</sup>**

142 In tetrameric DNA-bound crystal structures of Cre, the C-terminal helix  $\alpha$ N of each protomer  
143 packs in *trans* in a cyclic (non-reciprocal) manner into a surface cavity on a neighboring  
144 protomer composed of residues from  $\alpha$ F,  $\alpha$ G,  $\alpha$ H,  $\beta$ 2-3 loop,  $\alpha$ I,  $\alpha$ K and  $\alpha$ L regions (Fig. 1a).  
145 Since Cre is monomeric in the absence of DNA, the Van Duyne group had previously used  
146 crosslinking experiments to test the hypothesis that in free Cre the C-terminal region folds

147 back to dock over its own *trans* cavity in *cis*; those experiments failed to detect intramolecular  
148 crosslinks<sup>39</sup>. Nevertheless, the <sup>15</sup>N relaxation data (Fig. 2) would be consistent with a *cis*  
149 docking model in which rotational diffusion of  $\alpha$ N is coincident with overall tumbling of the  
150 protein.

151 To test whether the C-terminal region of Cre<sup>Cat</sup> might be docked in *cis*, instead of being  
152 extended for *trans* docking, we examined the effect of deleting the C-terminal residues on the  
153 NMR spectra. We constructed a C-terminal deletion lacking thirteen C-terminal residues  
154 including helix  $\alpha$ N: Cre<sup>Cat</sup> $\Delta$ C (residues 127- 330), obtained backbone resonance assignments  
155 from triple resonance NMR data, and compared the <sup>1</sup>H-<sup>15</sup>N TROSY-HSQC spectra of WT  
156 Cre<sup>Cat</sup> and Cre<sup>Cat</sup> $\Delta$ C (Fig. 3a, Supplementary Fig. 4). Large chemical shift perturbations  
157 (CSPs) were observed for residues in the interdomain linker region (Q133- A136), helices  
158  $\alpha$ H,  $\alpha$ K,  $\alpha$ M and the  $\alpha$ J-K loop (Fig. 3a). Each of the regions in the protein core that show  
159 large CSPs is in excess of 20 Å from the center of helix  $\alpha$ N in the synaptic structures. These  
160 findings are consistent with a *cis* docking arrangement of the C-terminus, and with the  
161 restricted internal motions inferred from <sup>15</sup>N relaxation studies.

162 Remarkably, when the CSPs for Cre<sup>Cat</sup> $\Delta$ C are mapped to the crystal structure of the  
163 protein (Fig. 3b), the CSPs do not map to the synaptic *trans* docking surface of Cre. The  
164 region of the interdomain linker that shows large CSPs (Q133- A136) is adjacent to the DNA  
165 binding surface and was found to be largely rigid on the ps-ns timescale (Fig. 2). Helix  $\alpha$ H  
166 contains active site residues R173 and E176,  $\alpha$ J-K loop and helix  $\alpha$ K contain the active site  
167 residues H289 and R292, while helix  $\alpha$ M contains the active site residue Y324.

168 These CSPs show that deletion of the C-terminal region alters the environment of  
169 residues surrounding the active site of Cre and part of its DNA binding surface. To ensure  
170 that the CSPs observed in these experiments are not an artifact of working with the catalytic

171 domain Cre<sup>Cat</sup>, we compared spectra between full-length Cre and the same C-terminal  
172 deletion: Cre $\Delta$ C (residues 1-330). An overlay of <sup>1</sup>H-<sup>15</sup>N TROSY-HSQC spectrum of full-length  
173 Cre on that of Cre $\Delta$ C showed the same CSPs for residues from the catalytic domain, and  
174 minimal perturbation of signals attributed to Cre<sup>NTD</sup> (Supplementary Fig. 5). Although CSPs  
175 can be due to either direct or indirect interactions<sup>40,41</sup>, the Cre<sup>Cat</sup> $\Delta$ C CSP data suggest that  
176 the C-terminal residues in Cre<sup>Cat</sup> pack in *cis* over the active site and DNA binding surface of  
177 Cre<sup>Cat</sup>, not over the *trans* docking surface.

178

### 179 **PRE-NMR data support *cis* docking of C-terminal helix $\alpha$ N of Cre**

180 To clarify whether the CSPs in the core of Cre<sup>Cat</sup> domain were induced by direct interactions  
181 or via indirect allosteric effects, we attached a nitroxide spin probe at the extreme C-terminus  
182 of Cre<sup>Cat</sup> and performed paramagnetic relaxation enhancement (PRE)-NMR experiments<sup>42-</sup>  
183 <sup>44</sup>. We constructed a variant of Cre<sup>Cat</sup> (C155A/C240A/D343C) that enabled attachment of the  
184 spin probe to the C-terminal cysteine residue and used <sup>1</sup>H-<sup>15</sup>N TROSY-HSQC spectra to  
185 verify that the mutations did not significantly perturb the structure of the protein (data not  
186 shown). The single cysteine mutant was then conjugated with a S-(1-oxyl-2,2,5,5-tetramethyl-  
187 2,5-dihydro-1H-pyrrol-3-yl) methyl methanesulfonothioate (MTSL) paramagnetic spin probe.  
188 Near 100% tagging efficiency was verified using MALDI mass spectrometry (data not shown).  
189 <sup>1</sup>H-<sup>15</sup>N TROSY-HSQC spectra of the MTSL tagged-protein under oxidized (paramagnetic)  
190 and reduced (diamagnetic) conditions were obtained and a comparison of the peak intensities  
191 was used to determine per-residue PRE effects in free Cre<sup>Cat</sup>. In such a PRE-NMR  
192 experiment, the lone-pair electron on a paramagnetic spin probe is expected to induce  
193 distance-dependent line broadening for protons up to 25 Å away<sup>45</sup>.

194 A strong correspondence between the C-terminus-linked PRE effects and previously  
195 observed CSPs provide evidence for *cis* packing of the C-terminus over the active site and  
196 DNA binding surface of Cre. In addition to residues sequentially neighboring C343, we  
197 observed strong PRE effects from the C-terminal C343-MTSL spin probe to a part of the  
198 interdomain linker (E129- A136), helix  $\alpha$ H (R173- A178), helix  $\alpha$ J (S257- I264),  $\alpha$ J-K loop  
199 (L284- R292) and helix  $\alpha$ M (G314- Y324) (Fig. 4a, Supplementary Fig. 6). To interpret the  
200 PRE effects in a structural context, we built a model of the MTSL tagged-protein using  
201 PyMOL<sup>46</sup> with PDB ID 2HOI, chain B as the template, manually added the two missing C-  
202 terminal residues (G342, C343), D343 substituted with cysteine, and attaching an MTSL  
203 moiety (coordinates from PDB ID 2XIU)<sup>47</sup> to the C343 sidechain, and mapped the PRE data  
204 onto this Cre<sup>Cat</sup> structural model (Fig. 4c: left). Each of the regions showing strong PRE effects  
205 in free Cre<sup>Cat</sup> are at distances in excess of 25 Å as measured from the C343-MTSL-oxygen  
206 to backbone amide nitrogen atoms: further than ~ 42 Å, ~ 47 Å, ~ 51 Å, ~ 42 Å, and ~ 37 Å,  
207 respectively (Supplementary Fig. 6a).

208 To rule out the possibility that the observed PRE effects were due to intermolecular  
209 interactions, we performed an intermolecular PRE experiment by recording <sup>1</sup>H-<sup>15</sup>N TROSY-  
210 HSQC spectra of a 1:1 mixture of [U-<sup>15</sup>N]-Cre<sup>Cat</sup> (non-tagged) with MTSL tagged- unlabeled  
211 Cre<sup>Cat</sup> C155A/C240A/D343C, under paramagnetic and diamagnetic conditions. Because the  
212 <sup>15</sup>N labels and MTSL tags are on different molecules any PRE effects must arise from  
213 intermolecular interactions (Supplementary Fig. 7a)<sup>48</sup>. Only a few sparse residues located in  
214 the *trans* docking surface of Cre showed intermolecular PRE effects, suggestive of very weak  
215 transient intermolecular interaction (Supplementary Fig. 7b, c). Thus, the strong  
216 intramolecular PRE effects in the <sup>1</sup>H-<sup>15</sup>N TROSY-HSQC amide spectrum of free Cre<sup>Cat</sup>

217 strongly support a model in which the C-terminal region makes a *cis* interaction with its own  
218 DNA binding surface (Fig. 4c: left and right).

219

## 220 **PRE-restraints yield a *cis* docked model of the C-terminus of Cre, consistent with CSPs**

221 To determine whether the covalent structure of Cre<sup>Cat</sup> would allow *cis* docking of helix  $\alpha$ N region  
222 without distorting other structural elements, we performed structure refinement using PRE-  
223 derived distances as restraints. Analysis of the free Cre<sup>Cat</sup> PRE  $I_{ox}/I_{red}$  values and <sup>15</sup>N R<sub>2</sub> relaxation  
224 rates yielded 124 restraints (Supplementary Table 1). To account for a distribution of spin probe  
225 positions, lower bounds were set to 5 Å below calculated distances while the upper bounds were  
226 set to 10 Å higher than the calculated distances. ROSETTA energy minimization was performed  
227 using upper and lower distance bounds, assuming a flexible C-terminus,  $\beta$ 2-3 loop and  $\alpha$ J-K loop  
228 regions; crystallographically observed secondary structure elements were enforced. Members of  
229 the PRE-derived Cre<sup>Cat</sup> ensemble (Fig. 5a) adopt stereochemically robust *cis* docked C-terminal  
230 conformations that differ significantly from the conformation observed in synaptic complexes (Fig.  
231 5b). These structures are consistent with CSP data, even though those were not used during  
232 refinement (Fig. 5c). Difference C $\alpha$ -C $\alpha$  contact map between the top ten conformers and the  
233 synaptic crystal structure (PDB ID 2HOI, chain A) show that the average changes in C-terminal  
234 inter-residue distances when *cis* docked, ranged in values as large as 25 Å (Fig. 5d).

235

## 236 **DNA binding perturbs the C-terminal region in Cre<sup>Cat</sup>**

237 Coincidence of the DNA binding site and *cis* docking surface of the Cre<sup>Cat</sup> C-terminal region  
238 led us to examine the effects of binding to a *loxP* DNA half-site substrate (Fig. 1c), on the  
239 protein C-terminus. The <sup>1</sup>H-<sup>15</sup>N TROSY-HSQC spectrum of the Cre<sup>Cat</sup>-DNA half-site complex  
240 showed CSPs in residues corresponding to the Cre-DNA interaction surface, comprising of

241 structural elements involved in DNA binding and the active site regions. Moreover, large  
242 CSPs (and broadening of resonances) were also observed in the C-terminal residues E331-  
243 D343, including helix  $\alpha$ N (Fig. 6a, b). The CSPs mapped on the crystal structure (Fig. 6c)  
244 show that *loxP* DNA half-site binds to Cre<sup>Cat</sup> in the manner predicted from available tetrameric  
245 structure models, but DNA binding also induces a change in the environment of the C-terminal  
246 residues, resulting in the observed CSPs.

247

### 248 **PRE-NMR data reveal a DNA binding-induced conformational change in the Cre C-** 249 **terminus**

250 Like for the free protein, we used PRE-NMR to determine the conformational space  
251 populated by the C-terminus of Cre upon binding to *loxP* DNA half-site. PRE effects were  
252 measured using MTSL tagged-Cre<sup>Cat</sup> C155A/C240A/D343C bound to the *loxP* half-site  
253 hairpin DNA. PRE effects were remarkably different in the DNA complexes in comparison to  
254 free Cre<sup>Cat</sup> (Fig. 4b, Supplementary Fig. 8). Low  $I_{ox}/I_{red}$  ratios were observed for helix  $\alpha$ F  
255 (E138- M149), helix  $\alpha$ G (G165- E176),  $\beta$ 2 and  $\beta$ 2-3 loop (G191- I195, G198 and V204),  $\beta$ 3-  
256  $\alpha$ I region (A212- R223), and helices  $\alpha$ K-  $\alpha$ L region (A291- G314). These regions together  
257 form the *trans* docking cavity that accommodates the C-terminus of neighboring Cre  
258 protomers in synaptic complexes (Fig. 1a, 4d: left and right). This change in PRE pattern (Fig.  
259 4a versus 4b) clearly identifies a DNA-induced conformational change that involves  
260 displacing the C-terminus from the DNA binding surface, to enable new protein-protein  
261 interactions; however, they do not establish whether those new interactions occur in *cis*  
262 (intramolecular), or in *trans* (intermolecular).

263 Intermolecular PRE-NMR studies with mixed isotopic labeling were then used to clarify  
264 whether the PRE effects observed in the presence of DNA arise from intra or intermolecular



265 interactions. We mixed DNA-bound non-tagged [U-<sup>15</sup>N]-Cre<sup>Cat</sup> and MTSL-tagged unlabeled  
266 Cre<sup>Cat</sup> C155A/C240A/D343C at a 1:1 molar ratio, to study possible intermolecular interactions  
267 in Cre<sup>Cat</sup> bound to DNA. Because these mixed samples have the potential to interact in four  
268 different relative orientations (Supplementary Fig. 9a), only one of which would generate  
269 measurable PRE effects (i.e., MTSL tagged- unlabeled Cre<sup>Cat</sup> C155A/C240A/D343C with C-  
270 terminus docking onto a [U-<sup>15</sup>N]-Cre<sup>Cat</sup>), the experiment would be predicted to yield weaker  
271 PRE effects in comparison to the experiments with uniformly labeled and MTSL tagged-  
272 Cre<sup>Cat</sup>-DNA complex (Fig. 4b); although observation of such effects in the same regions of  
273 the protein would support *trans* interactions. Despite the resonances being broader and data  
274 quality being generally lower, we indeed observed strong PRE effects consistent with docking  
275 of DNA-bound Cre C-terminal region over the *trans* docking surface (Supplementary Fig. 9b,  
276 c); these effects *must* arise from intermolecular interactions because of the labeling pattern  
277 used. Yet, a comparison to the similarly strong PRE effects in uniformly tagged and labelled  
278 Cre<sup>Cat</sup>-DNA complex studies (Supplementary Fig. 9c versus Fig. 4b) illustrates the possibility  
279 of a population of DNA-bound Cre C-terminus docking in *cis* over its own *trans* docking cavity,  
280 while another population extends out to dock in *trans* into the same cavity on another DNA-  
281 bound Cre molecule.

282

## 283 **DISCUSSION**

284 Cre recombinase has emerged as an important tool in molecular and cellular biology and has  
285 several features that make it an attractive reagent for gene editing<sup>7,49,50</sup>. Reaching that  
286 potential requires thorough characterization of its mechanism for DNA site selection, and  
287 control of its DNA cleavage and recombination activity. High-resolution structural studies of  
288 Cre, largely limited to crystal structures of DNA bound tetrameric synaptic complexes, have

289 suggested a role for conformational plasticity in facilitating the steps within the reaction  
290 mechanism. We set out to characterize the solution behavior of Cre in its free and DNA bound  
291 states in order to understand the link between protein dynamics and regulation of Cre  
292 assembly and activity. While solution NMR studies yielded some results consistent with  
293 previous understanding of this prototypical member of the tyrosine recombinase family, other  
294 surprising results call for a revised view of the reaction mechanism.

295 Solution NMR data showed Cre<sup>Cat</sup> to be independent of Cre<sup>NTD</sup>. The well-dispersed  
296 signals in the <sup>1</sup>H-<sup>15</sup>N TROSY-HSQC NMR spectrum of Cre<sup>Cat</sup> are nearly superimposable on  
297 that of full-length Cre, except for the signals attributable to N-terminal domain Cre<sup>NTD</sup>  
298 (Supplementary Fig. 1b). The domains' structural independence could imply variability in  
299 inter-domain orientations that would be expected to prevent formation of suitable crystal  
300 lattices for x-ray diffraction. It however facilitated detailed NMR studies with the Cre<sup>Cat</sup> domain,  
301 wherein reside the active site residues and sequence specificity determinants, focused on  
302 testing the role of protein dynamics in regulation of Cre function<sup>33-36</sup>.

303 Our findings of the protein dynamics in specific regions within Cre<sup>Cat</sup> revealed unique  
304 spectral signatures linked to their functional roles. Underlying flexibility in Cre<sup>Cat</sup> revealed by  
305 nuclear spin relaxation measurements (<sup>15</sup>N R<sub>1</sub>, R<sub>2</sub> and {<sup>1</sup>H}-<sup>15</sup>N HetNOE), were consistent  
306 with the monomeric 217-residue protein construct ( $\tau_C$ , 13.2 ns). A portion of the linker, the  
307  $\beta$ 2-3 loop, the  $\alpha$ J-K loop and the  $\alpha$ M-N loop each exhibit higher R<sub>1</sub>, lower R<sub>2</sub>, and reduced  
308 HetNOE values, indicative of fast internal motions. Within the Cre<sub>4</sub>-loxP<sub>2</sub> tetrameric synaptic  
309 complexes, conformational differences in the  $\beta$ 2-3 loop and the C-terminal regions (including  
310 helix  $\alpha$ N) that form structural bridges that link adjacent protomers, and in helix  $\alpha$ M bearing  
311 the catalytic tyrosine, distinguish the catalytically "active" and "inactive" Cre protomers<sup>5,16,22</sup>.  
312 Flexibility of the  $\beta$ 2-3 loop observed in free Cre<sup>Cat</sup> could be expected to prevent stabilization

313 of the active site geometry in uncoordinated Cre protomers. The alternating conformations of  
314 the loop in tetrameric synaptic complexes indicates that this flexibility will be still retained,  
315 thereby enabling its regulatory role over adjacent active site structures. The protein dynamics  
316 observed in the  $\alpha$ -J-K loop in the free protein may serve to facilitate DNA binding and could  
317 thereafter be predicted to undergo quenching since this region does not show structural  
318 plasticity between the various Cre reaction intermediates. The surprise within the protein  
319 dynamics analysis lies in the observation that while residues flanking C-terminal helix  $\alpha$ N  
320 exhibit flexibility on the ps-ns timescale,  $\alpha$ N itself does not, and instead exhibits relaxation  
321 rates consistent with overall tumbling of the protein, counter to the expectation that the Cre  
322 C-terminus would flexibly adopt a range of extended conformations to facilitate capturing an  
323 adjacent protomer via *trans* docking contacts.

324 An unexpected C-terminal *cis* docking interaction in the proximity of the free Cre active  
325 site was revealed from our highly correlated CSP and PRE-NMR experiments. Given the  
326 known *trans* docking site, and prior incongruities regarding *cis* or *trans* cleavage by Cre and  
327 other recombinases<sup>51</sup>, a logical presumption was that in free Cre, helix  $\alpha$ N might dock in *cis*  
328 in the same site it occupies when assembled in *trans* in synaptic complexes; indeed, such a  
329 premise was previously tested experimentally using disulfide crosslinking strategies<sup>39</sup>. Were  
330 that the case, one would predict that deletion of helix  $\alpha$ N would result in CSPs for residues  
331 flanking that *trans* docking surface cavity. Instead, we observed the largest CSPs for residues  
332 on the other side of the protein – namely, the DNA binding and active site surfaces (Fig. 3).  
333 Since CSPs can arise from both proximity and induced conformational changes, we employed  
334 distance-dependent effects in PRE-NMR experiments to conclusively demonstrate the  
335 proximity of the protein C-terminus to the active site and DNA binding regions (Fig. 4a).  
336 Consistent with size exclusion chromatography (Supplementary Fig. 1a), NMR relaxation

337 (Fig. 2) and previous sedimentation velocity experiments<sup>17</sup> that show unbound Cre to be  
338 monomeric in solution, the absence of strong intermolecular PREs (Supplementary Fig. 7)  
339 indicates that docking of the C-terminus of free Cre onto the DNA binding surface indeed  
340 occurs *intra*-molecularly, in *cis*. *Cis*-docked models generated using distance bounds derived  
341 from the PRE data satisfy the restraints, covalent structure, and are in excellent agreement  
342 with the CSPs obtained upon deletion of the C-terminal region (Fig. 5). A comparison between  
343 the free Cre<sup>Cat</sup> ensemble model and the Cre<sup>Cat</sup> structure from crystallographic DNA bound  
344 synaptic complex protomers shows changes in inter-residue contacts as large as 20- 25 Å  
345 (Fig. 5d). Thus, these data provide strong evidence that in the absence of DNA the C-terminal  
346 residues dock in *cis* over the DNA binding and active site surfaces, in an apparent auto-  
347 inhibitory state.

348 A Cre structure in which the C terminus is docked in *cis* over the active site would  
349 seem incompatible with a DNA-bound state – so, how is this conundrum resolved? PRE-NMR  
350 data on the Cre<sup>Cat</sup>-DNA complex show that the C-terminus of Cre<sup>Cat</sup> is displaced from the *cis*  
351 docking surface when DNA binds there, since PRE effects are instead observed at the *trans*  
352 docking cavity (Fig. 4b). This *loxP* binding-induced pattern of PREs at the *trans* docking site  
353 clearly indicates relocation of C-terminal helix  $\alpha$ N, but does not clarify whether docking occurs  
354 in *cis*, or in *trans* to a nearby Cre molecule. The use of a DNA *loxP* half-site substrate would  
355 be expected to prevent assembly of pre-synaptic complexes with two Cre molecules bound  
356 to DNA; however, PRE effects can be observed even when interactions are transient<sup>52</sup>.  
357 Although partially attenuated, intermolecular PRE effects were indeed observed at the same  
358 *trans* docking cavity in experiments where the NMR signals from DNA-bound Cre<sup>Cat</sup> arise  
359 from protein molecules not tagged with MTSL (Supplementary Fig. 9). This attenuation could  
360 result from the fact that only one-fourth of protein-protein contacts within DNA-bound

361 complexes can produce *intermolecular* PRE effects (i.e., when C-terminus from MTSL-tagged  
362 un-labeled Cre<sup>Cat</sup> docks in *trans* over non-tagged [U-<sup>15</sup>N]-Cre<sup>Cat</sup> when bound to DNA;  
363 Supplementary Fig. 9a), or may indicate that in the presence of DNA, *intramolecular cis*  
364 docking over the protomer's own *trans* docking cavity is also possible. However, molecular  
365 modeling calculations starting from the DNA-bound crystal structure (data not shown)  
366 indicated that the C-terminal helix  $\alpha$ N region could not pack over its own *trans* docking cavity  
367 without significant conformational strain, involving additional remodeling that would be  
368 inconsistent with the NMR CSP data (Fig. 5). We conclude that in the absence of DNA, the  
369 C-terminal residues spanning helix  $\alpha$ N occupy the DNA binding surface of Cre, and that  
370 binding to DNA produces a large conformational change that enables productive *trans*  
371 protein-protein interactions with adjacent Cre molecules.

372         The rigidity and apparent auto-inhibitory conformation observed in C-terminal residues  
373 in free Cre could be expected to disfavor oligomerization of the protein prior to *loxP* DNA  
374 binding and play a role in selectively inhibiting spurious uncoordinated DNA cleavage and  
375 recombination activity. Although it is unclear whether the *cis* docking conformation of C-  
376 terminal region in free Cre serves additional roles, for example by obstructing inadvertent  
377 binding to non-cognate DNA substrates, our data suggests that the conformational  
378 rearrangements following the displacement of *cis* docking C-terminal upon *loxP* DNA half-site  
379 binding, comprise the mechanistic step that could trigger Cre protomer stepwise assembly on  
380 *loxP* through protein-protein interactions via the now exposed C-terminal residues.

381         These studies expand our understanding of the regulatory role played by C-terminal  
382 residues in Cre<sup>5,16,17</sup>. DNA-binding associated conformational changes mediated by C-  
383 terminal regions of Cre and related recombinases have been implicated in catalytic activation  
384 and initiation of oligomerization<sup>2,5,28</sup>. However, the structural basis for Cre to undergo

385 stepwise assembly on the DNA recognition sites have remained poorly understood due to  
386 lack of structural information on pre-synaptic reaction intermediates. The features of Cre and  
387 Cre-*loxP* complexes presented here provide insight into both the unliganded state of Cre, as  
388 well as the mechanism of initiation of protein-protein interactions that lead to stepwise  
389 assembly of recombinogenic intasomes. Knowledge gaps remain, including understanding of  
390 precise structural rearrangements that accompany the *cis* to *trans* switch in pre-synaptic Cre  
391 recombinase. Nevertheless, these investigations provide a new NMR perspective on Cre  
392 recombinase and represent a transformative step towards understanding the structure,  
393 function and mechanism of this important and widely used gene editing tool.  
394

395

## 396 **METHODS**

### 397 **Protein expression, purification, and site-directed mutagenesis**

398 The deletion construct containing the catalytic domain and the interdomain linker (Cre<sup>Cat</sup>,  
399 residues 127- 343) was prepared using QuikChange Site-Directed Mutagenesis Kit (Agilent)  
400 from a pET21A vector (Novagen) encoding WT Cre Recombinase (provided by Dr. Gregory  
401 Van Duyne, U. Penn). Further truncation and point mutants of Cre<sup>Cat</sup> construct were prepared  
402 using the Q5 Site-Directed Mutagenesis Kit (NEB). Protein expression from *E. coli* BL21(DE3)  
403 cells was carried out by growing freshly transformed cells (using Ampicillin antibiotic, 100  
404 mg/L) in LB media (natural abundance Cre) or M9 minimal medium (isotopically labeled [U-  
405 <sup>15</sup>N] and [U-<sup>13</sup>C, <sup>15</sup>N] Cre) supplemented with 1 g/L [<sup>15</sup>N]-ammonium chloride (Cambridge  
406 Isotopes) as the sole nitrogen source or 2 g/L [<sup>13</sup>C]-glucose (Cambridge Isotopes) as the sole  
407 carbon source in addition to [<sup>15</sup>N]-ammonium chloride. The cells were grown (shaking at 220  
408 rpm, 37 °C) to an OD<sub>600</sub> of 0.6- 0.8 and induced with 0.75 mM isopropyl β-D-1-

409 thiogalactopyranoside (Gold Biotechnology) for 12 h. After harvesting the cells (4000 g, 15  
410 min, 4 °C) and sonication, the Cre constructs in 40 mM tris, 100 mM NaCl, pH 7.0 buffer  
411 containing 1 protease inhibitor cocktail tablet (Roche), were purified using 5 ml SPFF cation  
412 exchange column (GE Healthcare) with a 100 ml gradient of 0.1 to 1 M NaCl. The protein  
413 fractions (eluted at ~ 0.4 M NaCl) were combined and diluted four times with low salt buffer  
414 40 mM tris, 100 mM NaCl pH 7.0 and further purified on a 5 ml Heparin affinity column (GE  
415 Healthcare) with a 100 ml gradient of 0.1 to 1.5 M NaCl. Protein fractions (eluted at ~ 1 M  
416 NaCl) were then purified using a HiLoad 16/60 Superdex 75 (GE Healthcare) column (SEC)  
417 in 40 mM tris, 500 mM NaCl pH 7.0 buffer. Purified protein concentrations were determined  
418 using UV-Vis spectroscopy ( $\epsilon$  for Cre<sup>Cat</sup> = 23,950 M<sup>-1</sup> cm<sup>-1</sup> at 280 nm). Typical yields obtained  
419 were ~20-25 mgs protein per L of culture.

420

#### 421 **Cre<sup>Cat</sup>-DNA complex NMR sample preparation**

422 *loxP* half-site hairpin was formed from single-stranded DNA oligos (IDT) containing  
423 recombinase binding elements along with additional GC bps at ends, symmetrized spacer  
424 bps and a GAA hairpin<sup>53</sup>:

425 5'-GCATAACTTCGTATAGCATATGCGAAGCATATGCTATACGAAGTTATGC-3'.

426 The lyophilized DNA oligo was resuspended in H<sub>2</sub>O and heated at 95 °C for 15 mins and  
427 immediately cooling on ice. To avoid precipitation, Cre<sup>Cat</sup> and *loxP* DNA hairpin at low  
428 concentrations (< 50  $\mu$ M) in high salt buffer (10 mM Tris, > 500 mM NaCl, pH 7.0) were mixed  
429 by stepwise titration of the protein into DNA. The solution was then dialyzed into low salt NMR  
430 buffer (10 mM tris, 15 mM NaCl, 0.02% NaN<sub>3</sub>, pH 7.0) at 4 °C. The protein-DNA complex  
431 sample was then concentrated using 500  $\mu$ L, 1 kDa centrifugal filters (VWR).

432

### 433 **NMR data collection**

434 Purified [U-<sup>15</sup>N]- or [U-<sup>15</sup>N, <sup>13</sup>C]- Cre<sup>Cat</sup> samples were concentrated to 0.5- 1.0 mM after dialysis  
435 into buffer containing 10 mM Tris, 100 mM NaCl, 0.02 % NaN<sub>3</sub>, pH 7.0. When required, the  
436 samples were exchanged into 10 mM d<sub>11</sub>-Tris (Sigma), 100 mM NaCl, 0.02 % NaN<sub>3</sub>, pH 7.0  
437 buffer, using Sephadex PD10 columns (GE Healthcare). 5-10 % (v/v) D<sub>2</sub>O (99 %) and 0.66  
438 mM DSS were added to the NMR samples. NMR data were recorded on Bruker Avance III  
439 HD spectrometers operating at 850, 800 or 600 MHz equipped with a 5 mm triple resonance  
440 cryoprobes and z axis gradients, at 25 °C. Data were processed with NMRPipe<sup>54</sup> or NMRFX<sup>55</sup>  
441 and visualized using NMRView<sup>56</sup>. Typical <sup>1</sup>H-<sup>15</sup>N TROSY-HSQC 2D correlation spectra were  
442 recorded using 16- 24 scans and 2048 x 128 data points.

443

### 444 **NMR chemical shift assignment and perturbation mapping**

445 For backbone chemical shift assignments, TROSY triple-resonance spectra HNCO, HNCA,  
446 HN(CO)CA, HN(CA)CO, and non-TROSY CBCA(CO)NH and HA(CO)NH were recorded on  
447 purified [U-<sup>13</sup>C, <sup>15</sup>N] Cre<sup>Cat</sup> sample. Backbone assignment was achieved using NMRView  
448 aided by PINE<sup>57</sup> and CARA<sup>58</sup>.

449 CSPs were calculated from differences in peak positions using:

$$450 \quad \Delta\delta_{\text{NH}} = \sqrt{\Delta\delta_{\text{H}}^2 + \frac{(\Delta\delta_{\text{N}})^2}{25}}$$

451 where  $\Delta\delta_{\text{H}}$  is the chemical shift difference in the <sup>1</sup>H dimension and  $\Delta\delta_{\text{N}}$  is the chemical shift  
452 change in the <sup>15</sup>N dimension. Corrected standard deviations were determined by calculating



453 the SD of CSPs of all assigned residues, removing CSP data with > 3 SD and recalculating  
454 the SD.

455

#### 456 **<sup>15</sup>N relaxation measurements**

457 Backbone amide relaxation measurements were performed at 800 MHz proton Larmor  
458 frequency using [U-<sup>15</sup>N] Cre<sup>Cat</sup> at a concentration of 800 μM in 10 mM Tris, 100 mM NaCl,  
459 0.02 % NaN<sub>3</sub>, pH 7.0 buffer (5 % D<sub>2</sub>O v/v). TROSY versions of R<sub>1</sub> and R<sub>2</sub> experiment data  
460 were acquired using recycle delay of 2 seconds between experiments, and the following  
461 relaxation delays for R<sub>1</sub>: 0, 560, 1120 and 1680 ms with repeats and R<sub>2</sub>: 2, 24.2, 48.2, and  
462 72.2 ms. The R<sub>1</sub> and R<sub>2</sub> values were obtained by fitting the intensity of peaks to exponential  
463 decay function and errors were determined by relaxation curve fitting. 80-90 % of the amides  
464 were analyzed, after excluding those with significant resonance overlap. {<sup>1</sup>H}-<sup>15</sup>N HetNOE  
465 values were obtained by recording spectra with and without a <sup>1</sup>H pre-saturation period (8 s),  
466 in which <sup>1</sup>H signals were saturated using a train of 90° pulses, applied before the start of  
467 experiment. Non-overlapping assigned peaks were analyzed and the intensity ratio were  
468 determined using the HetNOE analysis tool within NMRViewJ; uncertainties were obtained  
469 from standard deviation of noise in the spectra.

470

#### 471 **Paramagnetic Relaxation Enhancement (PRE) - NMR**

472 We constructed a single-cysteine Cre<sup>Cat</sup> variant C155A/C240A/D343C to avoid unintended  
473 paramagnetic tagging of the native cysteines and thereby enable probing just the C-terminus.  
474 S-(1-oxyl-2,2,5,5-tetramethyl- 2,5-dihydro-1H-pyrrol-3-yl) methyl methanesulfonylthioate  
475 (MTSL) tagging of Cre<sup>Cat</sup> C155A/C240A/D343C was achieved by following a published

476 protocol<sup>59</sup>. Briefly, a 200 mM MTSL (Toronto Research Chemicals) stock was made by adding  
477 189  $\mu$ L of acetonitrile to 10 mg of MTSL (stored at -20 °C, protected from light). DTT was  
478 added to purified protein in high salt conditions (10 mM Tris, 500 mM NaCl, 5 mM DTT, pH  
479 7.0) to reduce possible disulfide bonds. The reducing agent was then removed by rapid buffer  
480 exchange into 10 mM Tris, 500 mM NaCl, pH 7.0 buffer using a PD10 desalting column (GE  
481 Healthcare). The sample was collected into exchange buffer containing ten-fold molar excess  
482 of MTSL and stirred at room temperature overnight. Excess MTSL was removed after reaction  
483 by buffer exchange with a second PD10 column, followed by dialysis (MWCO 3 kDa) into  
484 NMR buffer. Near 100 % MTSL tagging of the protein was verified using MALDI MS  
485 measurements as indicated by an increase in mass by 186 Da (weight of attached probe).  
486 Final sample concentrations ranged between 100-200  $\mu$ M at a volume of  $\sim$  500  $\mu$ L.

487 For PRE-NMR measurements, <sup>1</sup>H-<sup>15</sup>N TROSY-HSQC spectra were recorded on the same  
488 MTSL tagged-Cre<sup>Cat</sup> C155A/C240A/D343C sample before (paramagnetic) and after  
489 (diamagnetic) reduction of the spin probe by treatment with five-fold molar excess of sodium  
490 ascorbate (250 mM stock used for minimal sample dilution) for three hours at room  
491 temperature. Peak intensities were measured and normalized using intensities of residues  
492 (D153, E222, V230) > 45 Å away from C-terminus in PDB ID 2HOI, chain B. For MTSL  
493 probes,  $I_{ox}/I_{red}$  ratios between 0 and 1 indicate that the distance of probe to proton is within  
494 13- 25 Å. Uncertainties in  $I_{ox}/I_{red}$  values were propagated from signal-to-noise ratio of each  
495 resonance in the two spectra using:

$$496 \quad \sigma I_{ox}/I_{red} = I_{ox}/I_{red} \sqrt{\left(\frac{\sigma_{I_{ox}}}{I_{ox}}\right)^2 + \left(\frac{\sigma_{I_{red}}}{I_{red}}\right)^2}$$

497 where  $\sigma I_{ox}/I_{red}$  is the calculated error in  $I_{ox}/I_{red}$  ratio,  $\sigma_{I_{ox}}$  is the standard deviation of the noise  
498 in the MTSL oxidized spectrum, and  $\sigma_{I_{red}}$  is the standard deviation in the reduced spectrum.

499 For the intermolecular PRE studies, [U-<sup>15</sup>N]-Cre<sup>Cat</sup> (non-MTSL-tagged) was mixed with MTSL  
500 tagged-natural abundance Cre<sup>Cat</sup> C155A/C240A/D343C, at a 1:1 molar ratio in NMR buffer  
501 (10 mM Tris, 100 mM NaCl, pH 7.0) at 25 °C. For similar studies with the protein-DNA  
502 complex, the complex samples with/without MTSL tags were prepared separately and mixed  
503 at a molar ratio of 1:1.

504

### 505 **PRE-restrained modeling using ROSETTA**

506 PRE derived-distance constraints for use in structural modeling were generated using the  
507 approach of Battiste and Wagner<sup>42</sup>. Briefly, per residue  $R_2^{sp}$  values (paramagnetic relaxation  
508 rate due to the spin tag) were obtained from:

$$509 \quad I_{ox} / I_{red} = \frac{R_2 e^{-R_2^{sp} t}}{R_2 + R_2^{sp}}$$

510 where  $R_2$  is the transverse relaxation rate of each amide and  $t$  is the acquisition time in the  
511 proton dimension.  $R_2^{sp}$  values were then used to obtain the approximate distance,  $r$  (Å)  
512 between the spin tag to the amide proton of each residue:

$$513 \quad r = \left[ \frac{K}{R_2^{sp}} \left( 4\tau_c + \frac{3\tau_c}{1 + \omega_h^2 \tau_c^2} \right) \right]^{\frac{1}{6}}$$

514 where  $\tau_c$  (s) is per-residue correlation time of amide protons determined from  $R_2/R_1$  relaxation  
515 ratios,  $\omega_h$  (Hz) is the Larmor frequency of each amide proton, and  $K$  is a constant ( $1.23 \times 10^{-32}$   
516  $\text{cm}^6 \text{sec}^{-2}$ ) that encapsulates the spin properties of the MTSL tag<sup>42</sup>.

517 Distance restraints were used in a bounded form (typical for NOE constraints). Due to the  
518 relative imprecision of this method of constraint distance calculation<sup>44,60</sup>, residues with an  
519  $I_{ox}/I_{red}$  value less than 0.8 were assigned a lower bound of calculated  $r$  - 5 Å and an upper

520 bound was set to  $r + 10 \text{ \AA}$ . Residues with an  $I_{ox}/I_{red}$  value greater than 0.8 were assigned a  
521 lower bound of  $20 \text{ \AA}$  and no upper bound. Constraints for 124 residues in Cre<sup>Cat</sup> were obtained  
522 wherein data ( $I_{ox}$ ,  $I_{red}$ ,  $R_2$ ,  $\omega_n$ , and  $\tau_C$ ) for each amide proton was available.

523 ROSETTA energy minimization was performed using the relax application<sup>61–65</sup>. Chain  
524 A of PDB ID 2HOI (residues 127- 341, and G342 and D343C modeled) was used as the input  
525 structure with the D343C mutation. A move map file retained secondary structure of Cre<sup>Cat</sup>  
526 along with the following impositions: the  $\beta$ 2-3 and  $\alpha$ J-K loops and interdomain linker residues  
527 (A127-A134) were allowed to have backbone  $\phi$ ,  $\psi$ , and sidechain  $\chi_1$  torsional freedom based  
528 on flexibility observed via <sup>15</sup>N  $R_2/R_1$  data. C-terminal E331- C343 were also allowed to sample  
529 backbone and  $\chi_1$  angles allowing movement of helix  $\alpha$ N through space. Other residues were  
530 only allowed to undergo sidechain minimization. Constraints were used to generate 100 initial  
531 structures subsequently scored using the ref2015\_cst weights function<sup>66</sup>. The ten structures  
532 with the lowest *atom\_pair\_constraint* energy were selected as the input structures for a  
533 second round of minimization wherein ten structures were generated for each input structure.  
534 The resulting 100 structures constitute the PRE-NMR constrained ensemble model of free  
535 Cre<sup>Cat</sup>. Coarse grained contact maps were generated using MATLAB by calculating backbone  
536 inter-residue C $\alpha$ -C $\alpha$  distances from PDB files (2HOI, chain A residues 127- 341 and G342  
537 and D343C modeled, and top ten lowest energy members of free Cre<sup>Cat</sup> PRE-derived  
538 ensemble). Absolute values of change in inter-residue distances between the contact maps  
539 were determined by subtracting one distance matrix from the other.

540

## 541 DATA AVAILABILITY

542 The Cre<sup>Cat</sup> (residues 127- 343) backbone chemical shift assignments have been deposited  
543 in the Biological Magnetic Resonance Data Bank, [www.bmrb.wisc.edu](http://www.bmrb.wisc.edu) (accession no. 50270).

544

## 545 **ACKNOWLEDGEMENTS**

546 We thank Dr. Chunhua Yuan, Dr. Alex Hansen and Dr. Arpad Somogyi of the Ohio State  
547 University Campus Chemical Instrumentation Center for assistance with NMR experimental setup  
548 and mass spectrometry analysis and Dr. Eric Danhart for guidance with NMR data processing.  
549 We also thank Dr. Gregory Van Duyne (U. Penn) for providing the plasmids encoding Cre. This  
550 study was supported by NIH grant R01 GM122432 (to M.P.F), NSF MCB grant 0092962 (to  
551 M.P.F), and NIH/NIGMS grant 1P41GM111135 (to NMRBox).

552

## 553 **AUTHOR CONTRIBUTIONS**

554 Author contributions: A.U., C.A. and D.K.Y. and M.P.F. designed experiments; A.U., C.A.,  
555 D.K.Y and D.P. performed research; A.U., D.K.Y., C.A., K.S. and M.P.F. analyzed and  
556 interpreted data; and A.U. and M.P.F. wrote the manuscript.

557

## 558 **COMPETING INTERESTS**

559 The authors declare no competing financial interests.

560

## 561 **REFERENCES**

- 562 1. Bucholtz, F. Principles of site-specific recombinase (SSR) technology. *J. Vis. Exp.*  
563 (2008) doi:10.3791/718.
- 564 2. Nunes-Düby, S. E., Kwon, H. J., Tirumalai, R. S., Ellenberger, T. & Landy, A.  
565 Similarities and differences among 105 members of the Int family of site-specific  
566 recombinases. *Nucleic Acids Res.* **26**, 391–406 (1998).

- 567 3. Wirth, D. *et al.* Road to precision: recombinase-based targeting technologies for  
568 genome engineering. *Current Opinion in Biotechnology* (2007)  
569 doi:10.1016/j.copbio.2007.07.013.
- 570 4. Fogg, P. C. M., Colloms, S., Rosser, S., Stark, M. & Smith, M. C. M. New applications  
571 for phage integrases. *Journal of Molecular Biology* (2014)  
572 doi:10.1016/j.jmb.2014.05.014.
- 573 5. Van Duyne, G. D. Cre Rcombinase. *Microbiol. Spectr.* (2015).
- 574 6. Meinke, G., Bohm, A., Hauber, J., Pisabarro, M. T. & Buchholz, F. Cre Recombinase  
575 and Other Tyrosine Recombinases. *Chem. Rev.* (2016)  
576 doi:10.1021/acs.chemrev.6b00077.
- 577 7. Lanza, A. M., Dyess, T. J. & Alper, H. S. Using the Cre/lox system for targeted  
578 integration into the human genome: LoxFAS-loxP pairing and delayed introduction of  
579 Cre DNA improve gene swapping efficiency. *Biotechnol. J.* (2012)  
580 doi:10.1002/biot.201200034.
- 581 8. Grindley, N. D. F., Whiteson, K. L. & Rice, P. A. Mechanisms of Site-Specific  
582 Recombination. *Annu. Rev. Biochem.* (2006)  
583 doi:10.1146/annurev.biochem.73.011303.073908.
- 584 9. Landy, A. The  $\lambda$  Integrase Site-specific Recombination Pathway. *Microbiol. Spectr.*  
585 (2015) doi:10.1128/microbiolspec.mdna3-0051-2014.
- 586 10. Gaj, T., Gersbach, C. A. & Barbas, C. F. ZFN, TALEN, and CRISPR/Cas-based  
587 methods for genome engineering. *Trends in Biotechnology* (2013)  
588 doi:10.1016/j.tibtech.2013.04.004.
- 589 11. Cox, D. B. T., Platt, R. J. & Zhang, F. Therapeutic genome editing: Prospects and  
590 challenges. *Nature Medicine* (2015) doi:10.1038/nm.3793.
- 591 12. Groth, A. C. & Calos, M. P. Phage integrases: Biology and applications. *Journal of*  
592 *Molecular Biology* (2004) doi:10.1016/j.jmb.2003.09.082.
- 593 13. Craig, N. L. Conservative site-specific recombination. 77–105 (1988).
- 594 14. Birling, M. C., Gofflot, F. & Warot, X. Site-specific recombinases for manipulation of the  
595 mouse genome. *Methods Mol. Biol.* (2009) doi:10.1007/978-1-60327-019-9\_16.

- 596 15. Sternberg, N. Bacteriophage P1 site-specific recombination. *J. Mol. Biol.* **150**, 603–608  
597 (1981).
- 598 16. Guo, F., Gopaul, D. N. & Van Duyne, G. D. Structure of Cre recombinase complexed  
599 with DNA in a site-specific recombination synapse. *Nature* (1997) doi:10.1038/37925.
- 600 17. Ghosh, K., Guo, F. & Van Duyne, G. D. Synapsis of loxP sites by cre recombinase. *J.*  
601 *Biol. Chem.* (2007) doi:10.1074/jbc.M703283200.
- 602 18. Ghosh, K. & Van Duyne, G. D. Cre-loxp biochemistry. *Methods* (2002)  
603 doi:10.1016/S1046-2023(02)00244-X.
- 604 19. Gopaul, D. N., Guo, F. & Van Duyne, G. D. Structure of the Holliday junction  
605 intermediate in Cre-loxP site-specific recombination. *EMBO J.* **17**, 4175–4187 (1998).
- 606 20. Martin, S. S., Pulido, E., Chu, V. C., Lechner, T. S. & Baldwin, E. P. The order of strand  
607 exchanges in Cre-LoxP recombination and its basis suggested by the crystal structure  
608 of a Cre-LoxP holliday junction complex. *J. Mol. Biol.* (2002) doi:10.1016/S0022-  
609 2836(02)00246-2.
- 610 21. Ghosh, K., Lau, C. K., Gupta, K. & Van Duyne, G. D. Preferential Synapsis of Loxp  
611 Sites Drives Ordered Strand Exchange in Cre-Loxp Site-Specific Recombination. *Nat.*  
612 *Chem. Biol.* (2005) doi:10.1038/nchembio733.
- 613 22. Van Duyne, G. D. A structural view of Cre-loxP site-specific recombination. *Annual*  
614 *Review of Biophysics and Biomolecular Structure* (2001)  
615 doi:10.1146/annurev.biophys.30.1.87.
- 616 23. Rajeev, L., Malanowska, K. & Gardner, J. F. Challenging a Paradigm: the Role of DNA  
617 Homology in Tyrosine Recombinase Reactions. *Microbiol. Mol. Biol. Rev.* (2009)  
618 doi:10.1128/mnbr.00038-08.
- 619 24. Seah, N. E. *et al.* Nucleoprotein architectures regulating the directionality of viral  
620 integration and excision. *Proc. Natl. Acad. Sci. U. S. A.* (2014)  
621 doi:10.1073/pnas.1413019111.
- 622 25. Baldwin, E. P. *et al.* A specificity switch in selected Cre recombinase variants is  
623 mediated by macromolecular plasticity and water. *Chem. Biol.* (2003)  
624 doi:10.1016/j.chembiol.2003.10.015.



- 625 26. Duyne, G. D. Van. A STRUCTURAL VIEW OF Cre-loxP SITE -SPECIFIC  
626 RECOMBINATION. *Annu. Rev. Biophys. Biomol. Struct.* (2001).
- 627 27. Zhang, C. *et al.* Redesign of the monomer-monomer interface of Cre recombinase  
628 yields an obligate heterotetrameric complex. *Nucleic Acids Res.* (2015)  
629 doi:10.1093/nar/gkv901.
- 630 28. Aihara, H., Kwon, H. J., Nunes-Düby, S. E., Landy, A. & Ellenberger, T. A  
631 conformational switch controls the DNA cleavage activity of  $\lambda$  integrase. *Mol. Cell*  
632 (2003) doi:10.1016/S1097-2765(03)00268-5.
- 633 29. Subramaniam, S., Tewari, A. K., Nunes-Duby, S. E. & Foster, M. P. Dynamics and  
634 DNA substrate recognition by the catalytic domain of lambda integrase. *J. Mol. Biol.*  
635 **329**, 423–439 (2003).
- 636 30. Serre, M. C. *et al.* The Carboxy-Terminal  $\alpha$ N Helix of the Archaeal XerA Tyrosine  
637 Recombinase Is a Molecular Switch to Control Site-Specific Recombination. *PLoS One*  
638 (2013) doi:10.1371/journal.pone.0063010.
- 639 31. Hickman, A. B., Waninger, S., Scocca, J. J. & Dyda, F. Molecular organization in site-  
640 specific recombination: The catalytic domain of bacteriophage HP1 integrase at 2.7 Å  
641 resolution. *Cell* (1997) doi:10.1016/S0092-8674(00)80202-0.
- 642 32. Kazmierczak, R. A., Swalla, B. M., Burgin, A. B., Gumpert, R. I. & Gardner, J. E.  
643 Regulation of site-specific recombination by the C-terminus of  $\lambda$  integrase. *Nucleic*  
644 *Acids Res.* **30**, 5193–5204 (2002).
- 645 33. Gibb, B. *et al.* Requirements for catalysis in the Cre recombinase active site. *Nucleic*  
646 *Acids Res.* **38**, 5817–5832 (2010).
- 647 34. Hoess, R., Abremski, K., Irwin, S., Kendall, M. & Mack, A. DNA specificity of the cre  
648 recombinase resides in the 25 kDa carboxyl domain of the protein. *J. Mol. Biol.* **216**,  
649 873–882 (1990).
- 650 35. Rufer, A. W. Non-contact positions impose site selectivity on Cre recombinase. *Nucleic*  
651 *Acids Res.* **30**, 2764–2771 (2002).
- 652 36. Kim, S. T., Kim, G. W., Lee, Y. S. & Park, J. S. Characterization of Cre-loxP interaction  
653 in the major groove: Hint for structural distortion of mutant Cre and possible strategy



- 654 for HIV-1 therapy. *J. Cell. Biochem.* **80**, 321–327 (2000).
- 655 37. Lee, L. & Sadowski, P. D. Identification of Cre residues involved in synapsis,  
656 isomerization, and catalysis. *J. Biol. Chem.* **278**, 36905–36915 (2003).
- 657 38. Kay, L. E., Torchia, D. A. & Bax, A. Backbone Dynamics of Proteins As Studied by <sup>15</sup>N  
658 Inverse Detected Heteronuclear NMR Spectroscopy: Application to Staphylococcal  
659 Nuclease. *Biochemistry* (1989) doi:10.1021/bi00449a003.
- 660 39. Yuan, P. Structural and biochemical studies of site-specific recombinases. *Diss.*  
661 *available from ProQuest* 1–182 (2008).
- 662 40. Foster, M. P. *et al.* Chemical shift as a probe of molecular interfaces: NMR studies of  
663 DNA binding by the three amino-terminal zinc finger domains from transcription factor  
664 IIIA. *J. Biomol. NMR* (1998) doi:10.1023/A:1008290631575.
- 665 41. Williamson, M. P. Using chemical shift perturbation to characterise ligand binding.  
666 *Progress in Nuclear Magnetic Resonance Spectroscopy* (2013)  
667 doi:10.1016/j.pnmrs.2013.02.001.
- 668 42. Battiste, J. L. & Wagner, G. Utilization of site-directed spin labeling and high-resolution  
669 heteronuclear nuclear magnetic resonance for global fold determination of large  
670 proteins with limited nuclear overhauser effect data. *Biochemistry* (2000)  
671 doi:10.1021/bi000060h.
- 672 43. Marius Clore, G. & Iwahara, J. Theory, practice, and applications of paramagnetic  
673 relaxation enhancement for the characterization of transient low-population states of  
674 biological macromolecules and their complexes. *Chem. Rev.* (2009)  
675 doi:10.1021/cr900033p.
- 676 44. Clore, G. M. Practical Aspects of Paramagnetic Relaxation Enhancement in Biological  
677 Macromolecules. in *Methods in Enzymology* (2015). doi:10.1016/bs.mie.2015.06.032.
- 678 45. Altenbach, C., Oh, K. J., Trabanino, R. J., Hideg, K. & Hubbell, W. L. Estimation of  
679 inter-residue distances in spin labeled proteins at physiological temperatures:  
680 Experimental strategies and practical limitations. *Biochemistry* (2001)  
681 doi:10.1021/bi011544w.
- 682 46. DeLano, W. L. Pymol: An open-source molecular graphics tool. *CCP4 Newsl. Protein*

- 683            *Crystallogr.* (2002).
- 684    47.    Gruene, T. *et al.* Integrated analysis of the conformation of a protein-linked spin label  
685            by crystallography, EPR and NMR spectroscopy. *J. Biomol. NMR* (2011)  
686            doi:10.1007/s10858-011-9471-y.
- 687    48.    Janowska, M. K. & Baum, J. Intermolecular paramagnetic relaxation enhancement  
688            (PRE) studies of transient complexes in intrinsically disordered proteins. in *Methods in*  
689            *Molecular Biology* (2015). doi:10.1007/978-1-4939-2978-8\_3.
- 690    49.    Brault, V., Besson, V., Magnol, L., Duchon, A. & Héroult, Y. Cre/loxP-mediated  
691            chromosome engineering of the mouse genome. *Handbook of Experimental*  
692            *Pharmacology* (2007) doi:10.1007/978-3-540-35109-2-2.
- 693    50.    Sengupta, R. *et al.* Viral Cre-LoxP tools aid genome engineering in mammalian cells.  
694            *J. Biol. Eng.* (2017) doi:10.1186/s13036-017-0087-y.
- 695    51.    Esposito, D. & Scocca, J. J. The integrase family of tyrosine recombinases: Evolution  
696            of a conserved active site domain. *Nucleic Acids Res.* (1997)  
697            doi:10.1093/nar/25.18.3605.
- 698    52.    Clore, G. M. Seeing the invisible by paramagnetic and diamagnetic NMR. *Biochem.*  
699            *Soc. Trans.* (2013) doi:10.1042/BST20130232.
- 700    53.    Yoshizawa, S., Kawai, G., Watanabe, K., Miura, K. I. & Hirao, I. GNA trinucleotide loop  
701            sequences producing extraordinarily stable DNA minihairpins. *Biochemistry* (1997)  
702            doi:10.1021/bi961738p.
- 703    54.    Delaglio, F. *et al.* NMRPipe: A multidimensional spectral processing system based on  
704            UNIX pipes. *J. Biomol. NMR* (1995) doi:10.1007/BF00197809.
- 705    55.    Norris, M., Fetler, B., Marchant, J. & Johnson, B. A. NMRFX Processor: a cross-  
706            platform NMR data processing program. *J. Biomol. NMR* (2016) doi:10.1007/s10858-  
707            016-0049-6.
- 708    56.    Johnson, B. A. Using NMRView to visualize and analyze the NMR spectra of  
709            macromolecules. *Methods Mol. Biol.* (2004) doi:10.1385/1-59259-809-9:313.
- 710    57.    Bahrami, A., Assadi, A. H., Markley, J. L. & Eghbalnia, H. R. Probabilistic interaction  
711            network of evidence algorithm and its application to complete labeling of peak lists from

- 712 protein NMR spectroscopy. *PLoS Comput. Biol.* (2009)  
713 doi:10.1371/journal.pcbi.1000307.
- 714 58. Keller, R. *The computer aided resonance assignment tutorial. Goldau, Switzerland:*  
715 *Cantina Verlag* (2004).
- 716 59. Sjodt, M. & Clubb, R. Nitroxide Labeling of Proteins and the Determination of  
717 Paramagnetic Relaxation Derived Distance Restraints for NMR Studies. *BIO-*  
718 *PROTOCOL* (2017) doi:10.21769/bioprotoc.2207.
- 719 60. Iwahara, J., Schwieters, C. D. & Clore, G. M. Ensemble Approach for NMR Structure  
720 Refinement against <sup>1</sup>H Paramagnetic Relaxation Enhancement Data Arising from a  
721 Flexible Paramagnetic Group Attached to a Macromolecule. *J. Am. Chem. Soc.* (2004)  
722 doi:10.1021/ja031580d.
- 723 61. Conway, P., Tyka, M. D., DiMaio, F., Konerding, D. E. & Baker, D. Relaxation of  
724 backbone bond geometry improves protein energy landscape modeling. *Protein Sci.*  
725 (2014) doi:10.1002/pro.2389.
- 726 62. Khatib, F. *et al.* Algorithm discovery by protein folding game players. *Proc. Natl. Acad.*  
727 *Sci. U. S. A.* (2011) doi:10.1073/pnas.1115898108.
- 728 63. Nivón, L. G., Moretti, R. & Baker, D. A Pareto-Optimal Refinement Method for Protein  
729 Design Scaffolds. *PLoS One* (2013) doi:10.1371/journal.pone.0059004.
- 730 64. Tyka, M. D. *et al.* Alternate states of proteins revealed by detailed energy landscape  
731 mapping. *J. Mol. Biol.* (2011) doi:10.1016/j.jmb.2010.11.008.
- 732 65. Leaver-Fay, A. *et al.* Rosetta3: An object-oriented software suite for the simulation and  
733 design of macromolecules. in *Methods in Enzymology* (2011). doi:10.1016/B978-0-12-  
734 381270-4.00019-6.
- 735 66. Park, H. *et al.* Simultaneous Optimization of Biomolecular Energy Functions on  
736 Features from Small Molecules and Macromolecules. *J. Chem. Theory Comput.* (2016)  
737 doi:10.1021/acs.jctc.6b00819.
- 738

739 FIGURES

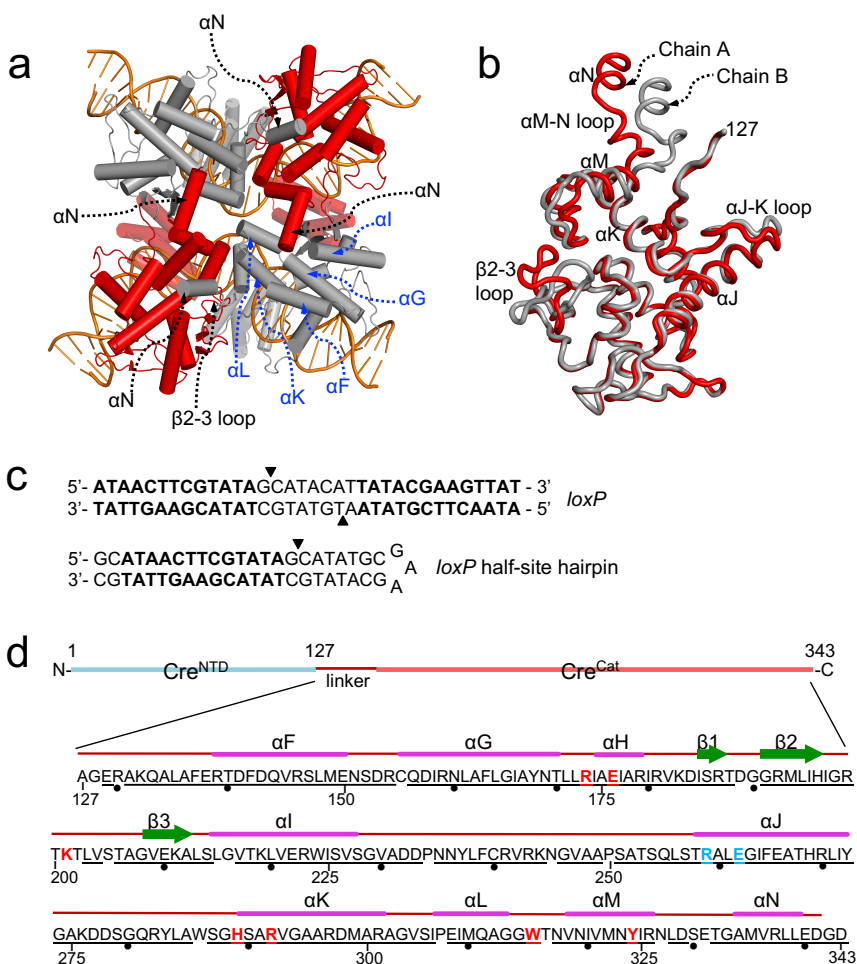

740

741

742 **Fig. 1** Conformational changes underlie coordinated DNA recombination by Cre  
 743 recombinase.

744 **a** Tetrameric synaptic complex of four Cre protomers bound to two *loxP* DNA duplexes (PDB  
 745 ID 2HOI), viewed from the catalytic domain, Cre<sup>Cat</sup>. C-terminal helix  $\alpha N$  of each protomer  
 746 packs into a *trans* surface cavity (labeled in blue) in the adjacent protomer.

747 **b** Superposition of Cre<sup>Cat</sup> domains from “inactive” (red) and “active” (gray) Cre protomers  
 748 (PDB ID 2HOI: chains A and B, respectively) highlight differences in the  $\beta 2-3$  loop, helix  $\alpha M$ ,  
 749  $\alpha M-N$  loop and C-terminal helix  $\alpha N$ .

750 **c** *loxP* DNA, and the *loxP* half-site hairpin DNA sequence used in these studies; arrows  
 751 indicate cleavage sites in full-length *loxP* DNA.

752 **d** Domain map of Cre recombinase. Residues 1-126 (blue) comprise the N-terminal domain  
 753 (Cre<sup>NTD</sup>). The interdomain linker and C-terminal catalytic domain comprise the Cre<sup>Cat</sup>  
 754 construct (residues 127- 343) used in these studies (pink). Sequence of the Cre<sup>Cat</sup> construct  
 755 is shown (numbered 127 to 343; dots shown as guide) with corresponding secondary  
 756 structure elements from synaptic complex crystal structure (PDB ID 2HOI, chain B); residues  
 757 G342 and D343 are not modeled in electron density maps. Active site and DNA binding  
 758 specificity determinant residues are highlighted in red and cyan respectively. Backbone  
 759 amide NMR chemical shift resonance assignments were made for all underlined residues.

761

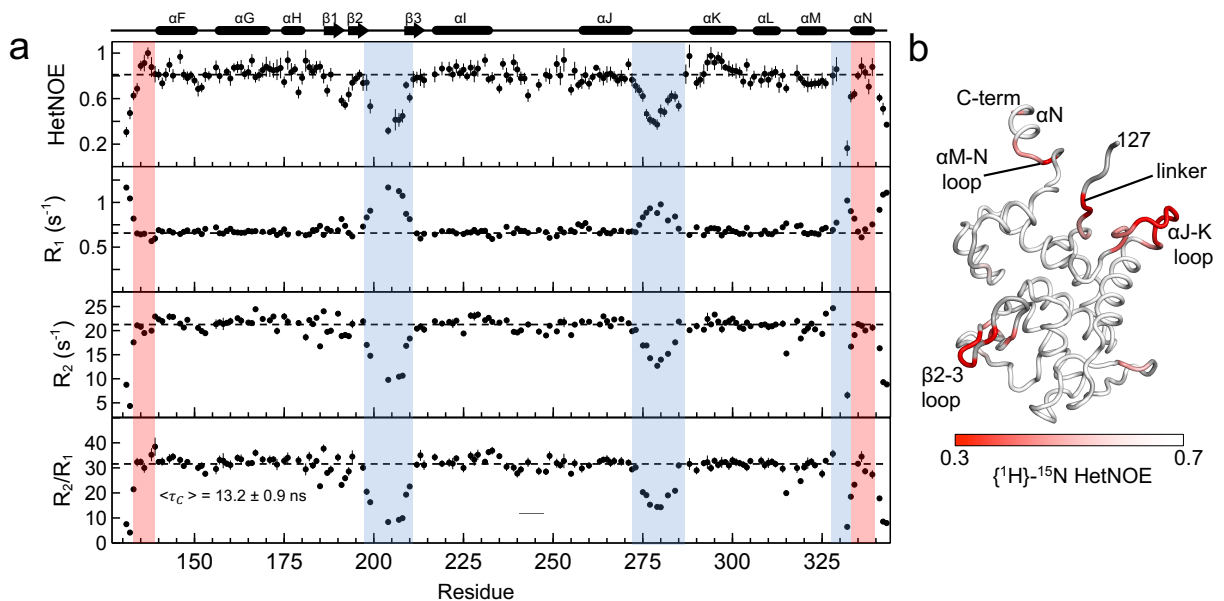

762

763 **Fig 2.** Cre<sup>Cat</sup> loops β2-3, αJ-K and αM-N, but not helix αN, exhibit fast timescale dynamics.

764 **a** {<sup>1</sup>H}-<sup>15</sup>N Heteronuclear NOE, <sup>15</sup>N longitudinal R<sub>1</sub> relaxation rate constant (s<sup>-1</sup>), <sup>15</sup>N  
 765 transverse R<sub>2</sub> relaxation rate constant (s<sup>-1</sup>) and corresponding R<sub>2</sub>/R<sub>1</sub> ratios for Cre<sup>Cat</sup>, 800  
 766 MHz; 298 K. Dashed lines in panels represent average values calculated excluding regions  
 767 of fast timescale dynamics. The secondary structure elements of Cre<sup>Cat</sup> synaptic complex  
 768 crystal structure (PDB ID 2HOI, chain B) are shown above the plot for comparison.

769 **b**  $\{^1\text{H}\}$ - $^{15}\text{N}$  HetNOE values for Cre<sup>Cat</sup> mapped onto the crystal structure (PDB ID 2HOI, chain  
 770 B) as a linear gradient from red (= 0.3) to white ( $\geq 0.7$ ). Residues with no data are shown in  
 771 gray.  
 772  
 773  
 774

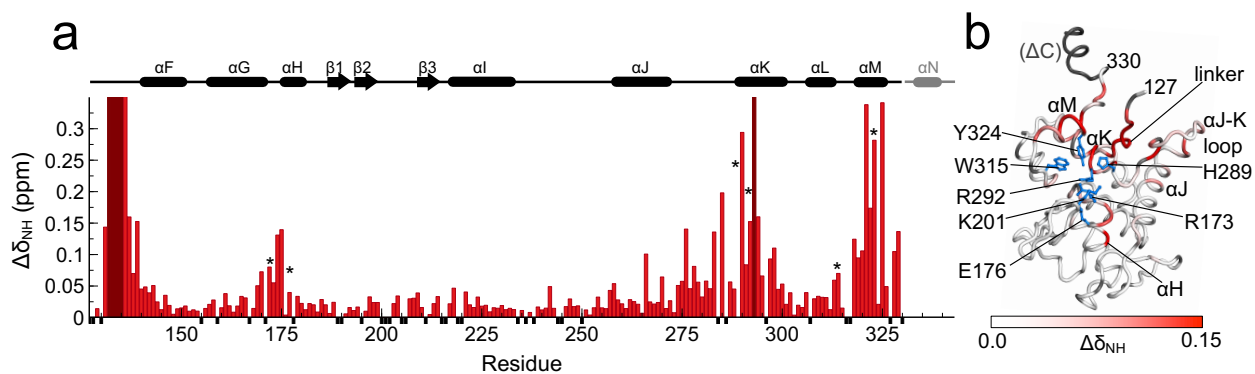

775  
 776 **Fig. 3** C-terminal deletion results in CSPs in the core of Cre<sup>Cat</sup>.  
 777 **a** Per-residue amide CSPs [ $\Delta\delta_{\text{NH}} = (\Delta\delta_{\text{H}}^2 + \Delta\delta_{\text{N}}^2/25)^{1/2}$ ] of Cre<sup>Cat</sup> upon truncation of last 13  
 778 amino acid from the C terminus  $\Delta(\text{E331}-\text{D343})$  (red bars). The secondary structure elements  
 779 of Cre synaptic complex crystal structure (PDB ID 2HOI, chain B) are shown above the plot.  
 780 Asterisks indicate regions of high CSP containing active site residues R173, E176, H289,  
 781 R292, W315 and Y324. Residues that showed largest CSPs or peak broadening beyond  
 782 detection (assigned in Cre<sup>Cat</sup> but unassigned in Cre<sup>Cat</sup> $\Delta\text{C}$  spectrum) are shown in maroon.  
 783 Unassigned residues are indicated by small negative black bars.  
 784 **b** Amide CSPs mapped onto the crystal structure (PDB ID 2HOI, chain B) as a linear gradient  
 785 from white (= 0.0 ppm) to red ( $\geq 0.15$  ppm). Sidechains of active site residues R173, E176,  
 786 K201 (modeled using PyMOL), H289, R292, W315 and Y324 are shown in blue. Truncated  
 787 C-terminal residues  $\Delta(\text{E331}-\text{D343})$  and unassigned residues are indicated in gray.

788

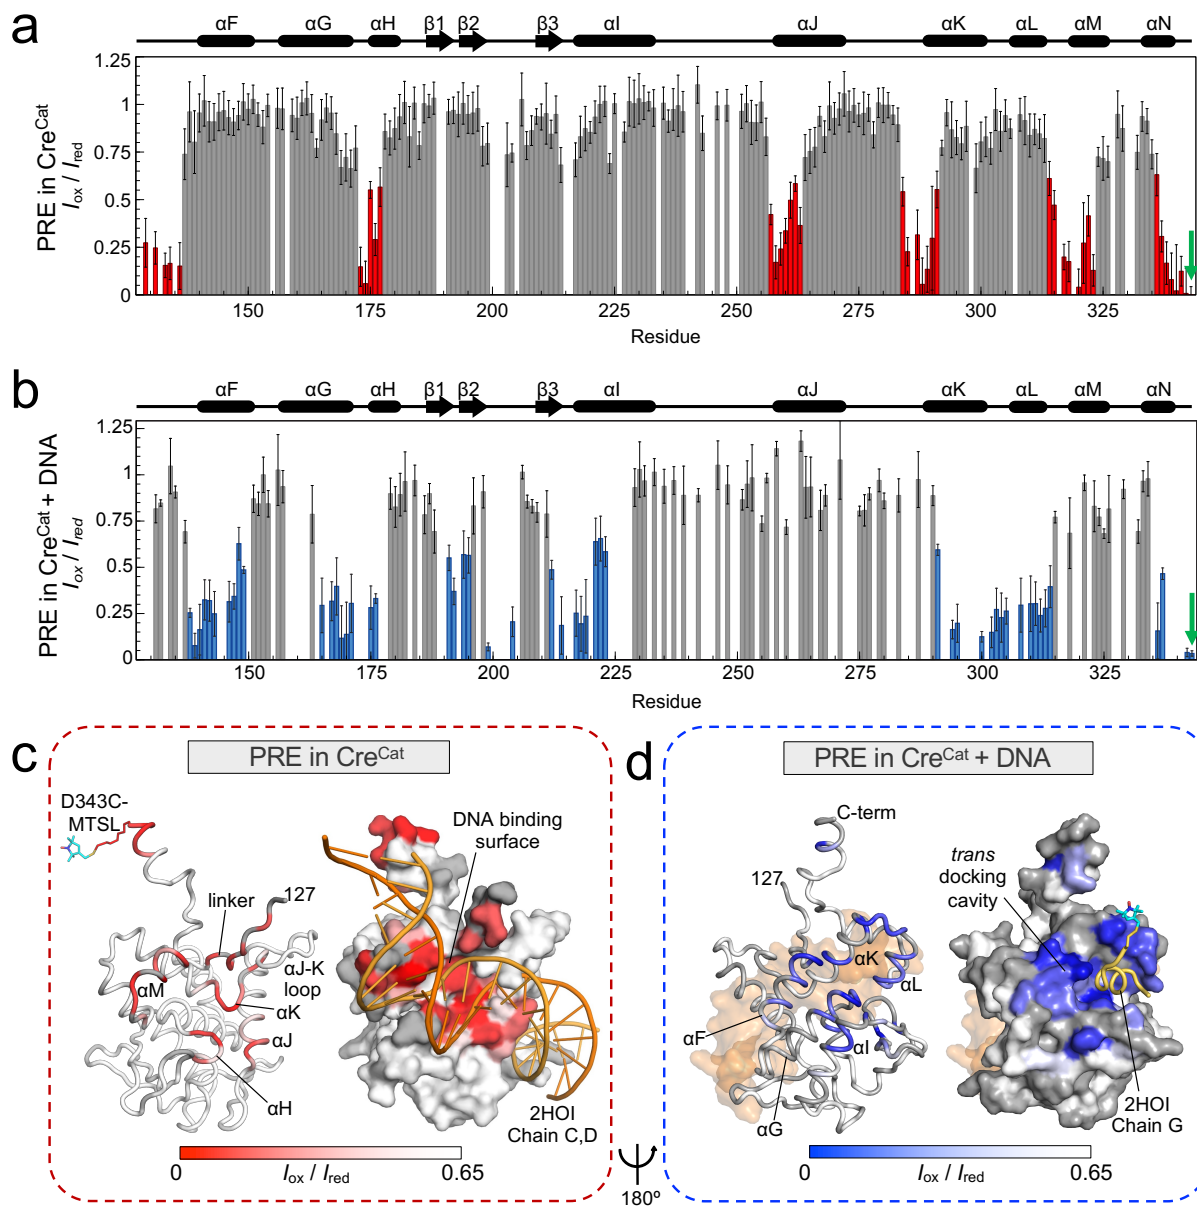

789

790 **Fig. 4** PRE-NMR data reveal a *cis* to *trans* docking conformational switch in the Cre<sup>Cat</sup> C-  
 791 terminus upon DNA binding.

792 **a** Per-residue amide PRE-NMR normalized intensity ratios ( $I_{ox}/I_{red}$ ) of free Cre<sup>Cat</sup>  
 793 C155A/C240A/D343C generated using an MTSL paramagnetic probe at C-terminal residue  
 794 C343 (green arrow); strong PRE effects ( $I_{ox}/I_{red} < 0.65$ ) are shown in red. Secondary structure  
 795 elements of Cre synaptic complex crystal structure (PDB ID 2HOI, chain B) are shown.  
 796 Uncertainties are propagated from the signal-to-noise ratio of individual resonances.

797 **b** Per-residue amide PRE-NMR normalized intensity ratios ( $I_{ox}/I_{red}$ ) for Cre<sup>Cat</sup>  
798 C155A/C240A/D343C bound to *loxP* half-site DNA generated using MTSL paramagnetic  
799 probe at C-terminal residue C343 (green arrow); strong PRE effects ( $I_{ox}/I_{red} < 0.65$ ) are shown  
800 in blue. Uncertainties are propagated from the signal-to-noise ratio of individual resonances.

801 **c**  $I_{ox}/I_{red}$  PRE values from free Cre<sup>Cat</sup> mapped to the structure of a protomer in the crystal  
802 structure (PDB ID 2HOI, chain B; G342, C343-MTSL modeled) as a gradient from red ( $I_{ox}/I_{red} =$   
803 0) to white ( $I_{ox}/I_{red} = 0.65$ ). Residues with no PRE data are shown in gray. Juxtaposed  
804 equivalent surface representation (same orientation) along with a portion of the *loxP* DNA, as  
805 seen in the crystal (PDB ID 2HOI, chains C and D) is shown in orange to illustrate the PRE  
806 effects mapping to the DNA binding surface.

807 **d**  $I_{ox}/I_{red}$  PRE values from the Cre<sup>Cat</sup>-DNA complex mapped to the structure of a protomer in  
808 the crystal structure (PDB ID 2HOI, chain B; G342, C343 modeled) as a gradient from blue  
809 ( $I_{ox}/I_{red} = 0$ ) to white ( $I_{ox}/I_{red} = 0.65$ ). Bound DNA (PDB ID 2HOI, chains C and D) is shown in  
810 pale orange. Residues with no PRE data are shown in gray. Juxtaposed equivalent surface  
811 representation (same orientation) along with C-terminal helix  $\alpha N$  region from an adjacent  
812 MTSL-tagged protomer (PDB ID 2HOI, chain G: E331-D341 and G342, C343-MTSL  
813 modeled) is shown in yellow to illustrate the PRE effects mapping to protein-protein *trans*  
814 docking surface cavity. Orientation of Cre<sup>Cat</sup> is rotated approximately 180° between Fig. 4c  
815 and **d**.

816



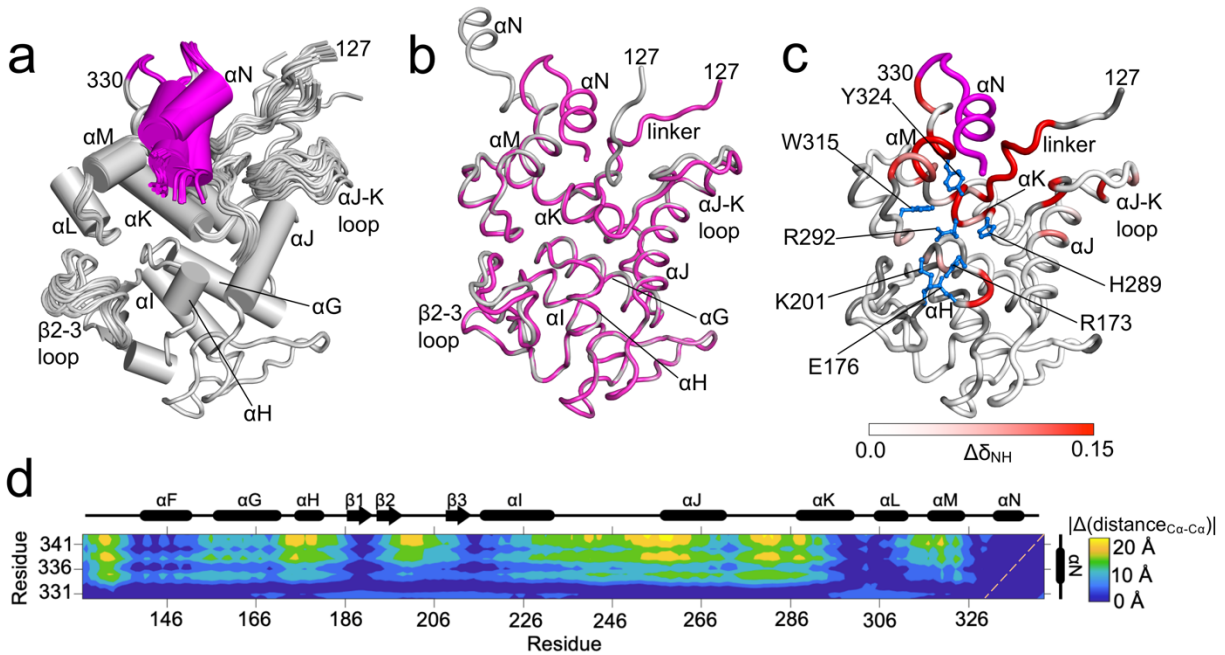

817

818 **Fig. 5** PRE-derived ensemble models of free Cre<sup>Cat</sup> shows *cis* docking of C-terminus over the  
 819 Cre<sup>Cat</sup> active site.

820 **a** Top fifty PRE-derived ROSETTA models of free Cre<sup>Cat</sup> showing *cis* docking of C-terminal  
 821 region (E331- D343; in magenta).

822 **b** Overlay of lowest ROSETTA energy member of the PRE-derived ensemble model  
 823 (magenta) and the crystal structure protomer (PDB ID 2HOI, chain A) (gray).

824 **c** CSPs in free Cre<sup>Cat</sup> upon C-terminal truncation  $\Delta$ (E331- D343) (magenta) mapped onto the  
 825 lowest energy member of the PRE-derived ensemble model as a linear gradient from white  
 826 (0.0 ppm) to red ( $\geq 0.15$  ppm). Unassigned residues are shown in gray (as in Fig. 3b).

827 **d** Difference in the inter-residue Ca-Ca contact map between the top ten PRE-derived models  
 828 and the DNA bound tetrameric crystal structure (PDB ID 2HOI, chain A) (absolute values of  
 829 changes in inter-residue distances  $|\Delta\text{distance}_{\text{Ca-Ca}}|$  (Å) are shown by a three-color heatmap  
 830 from blue to yellow). The secondary structure elements of Cre synaptic complex crystal  
 831 structure (PDB ID 2HOI, chain B) are shown along the axes. Diagonal is shown as dashed  
 832 line (orange).

833

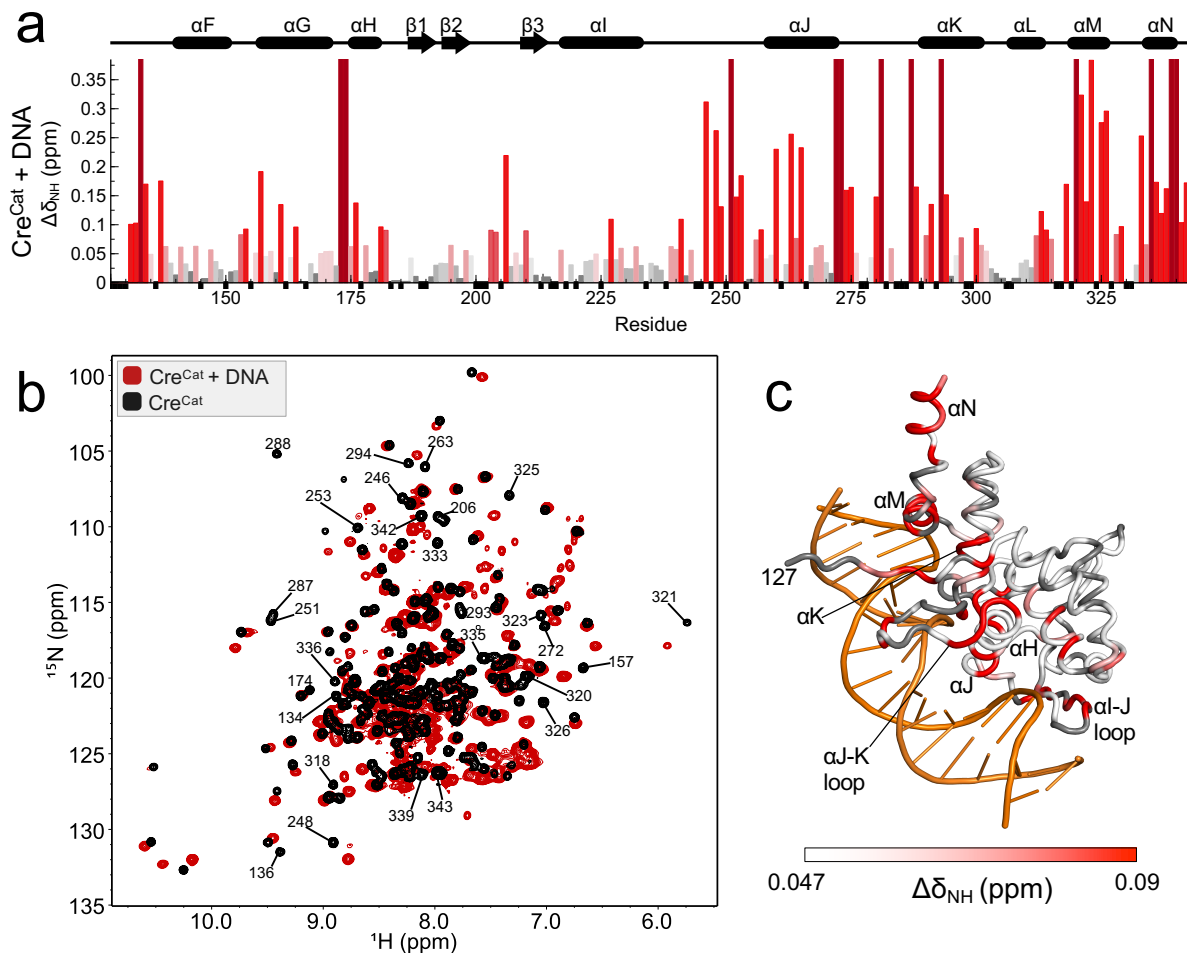

834

835 **Fig. 6.** C-terminal helix  $\alpha N$  region of Cre<sup>Cat</sup> is perturbed upon binding to *loxP* DNA

836 **a** Per-residue amide CSPs [ $\Delta\delta_{NH} = (\Delta\delta_H^2 + \Delta\delta_N^2/25)^{1/2}$ ] of Cre<sup>Cat</sup> upon binding to *loxP* half-  
 837 site hairpin DNA with a linear color ramp from gray (= 0 ppm) to red ( $\geq$  twice the  $\Delta\delta$  SD (0.047  
 838 ppm)). Largest CSPs, or those that resulted in peak-broadening beyond detectability  
 839 (assigned in free Cre<sup>Cat</sup> but unassigned in the Cre<sup>Cat</sup>- DNA complex) are shown in maroon.  
 840 Unassigned residues are indicated by small negative black bars. Secondary structure  
 841 elements of Cre synaptic complex crystal structure (PDB ID 2HOI, chain B) are shown above  
 842 the plot.

843 **b** Overlay of <sup>1</sup>H-<sup>15</sup>N TROSY-HSQC spectra of free Cre<sup>Cat</sup> (black) and bound to a DNA half-  
 844 site (red) with select residue assignments indicated (> 3 SD ppm).

845 **c** CSPs mapped onto the crystal structure (PDB ID 2HOI, chain B) as a linear gradient from  
846 white ( $\leq 1$  SD ppm) to red ( $\geq 2$  SD ppm). Unassigned residues are shown in gray.

847
